# Supplementary material for: Efficacy of a Synbiotic Containing Lactobacillus paracasei DKGF1 and Opuntia humifusa in Elderly Patients with Irritable Bowel Syndrome: A Randomized, Double-Blind, Placebo-Controlled Trial
Source: PubMed Central journal article supplement — Gut Liver. 2022 May 25;17(1):100–7. doi: 10.5009/gnl210478 (PMC9840930; doi:10.5009/gnl210478), 2022-05-25
Supplement: gnl-17-1-100-supple.pdf [file gnl-17-1-100-supple.pdf]

**Supplementary Table 1.** Weekly Responder Rates of Subject Global Assessment

| Subject global assessment | Placebo (n=34) | Synbiotics (n=33) | p-value |
|---------------------------|----------------|-------------------|---------|
| 1st wk                    | 6 (17.6)       | 10 (30.3)         | 0.220   |
| 2nd wk                    | 4 (11.8)       | 15 (45.5)         | 0.002   |
| 3rd wk                    | 9 (26.5)       | 14 (42.4)         | 0.160   |
| 4th wk                    | 6 (17.6)       | 21 (63.6)         | <0.001  |

Data are presented as number (%).

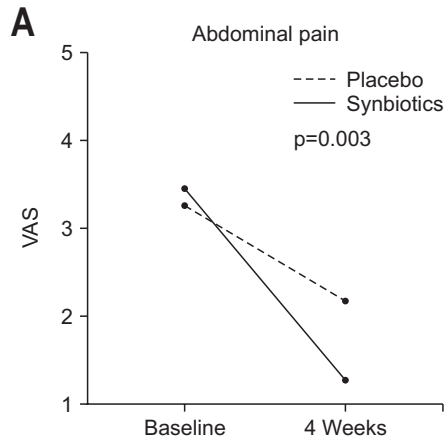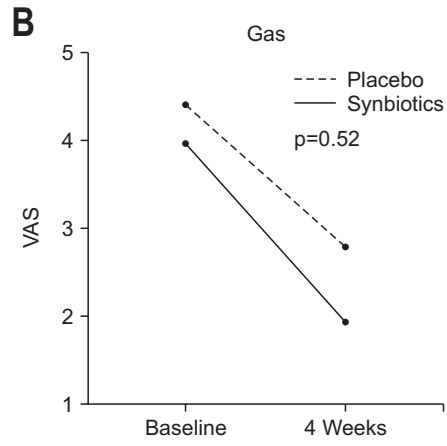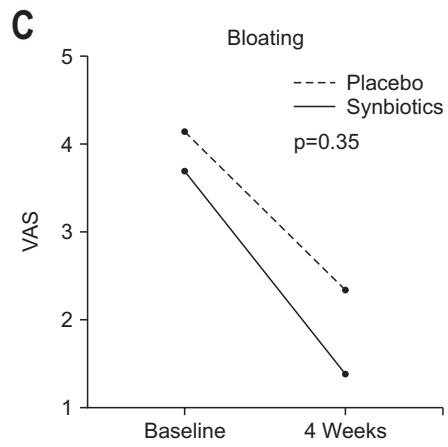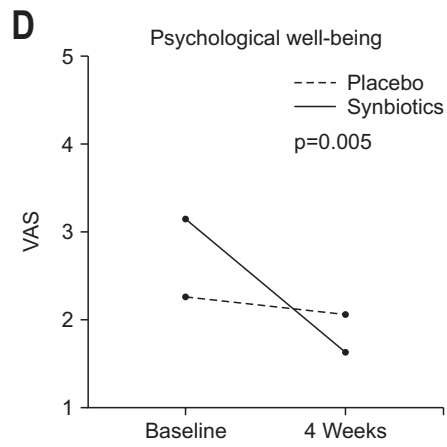

**Supplementary Fig. 1.** Changes in (A) abdominal pain, (B) gas, (C) bloating, and (D) psychological well-being assessed with the visual analog scale (VAS).
